# Supplementary material
Source: Research Square preprint supplement (doi:10.21203/rs.3.rs-9456495/v1)
Supplement: Supplementary file 1 [file 3d8300f4c3b47becffe958fa.xlsx]

## Sheet: WOS核心数据集
年份	WOS CORE	有效	文章信息
1937	0	0
1938	0	0
1939	0	0
1940	0	0
1941	0	0
1942	0	0
1943	0	0
1944	0	0
1945	0	0
1946	0	0
1947	0	0
1948	0	0
1949	0	0
1950	0	0
1951	0	0
1952	0	0
1953	0	0
1954	0	0
1955	0	0
1956	0	0
1957	0	0
1958	0	0
1959	0	0
1960	0	0
1961	0	0
1962	0	0
1963	0	0
1964	0	0
1965	0	0
1966	0	0
1967	0	0
1968	0	0
1969	0	0
1970	0	0
1971	0	0
1972	0	0
1973	0	0
1974	0	0
1975	0	0
1976	0	0
1977	0	0
1978	0	0
1979	0	0
1980	0	0
1981	1	0
1982	0	0
1983	0	0
1984	0	0
1985	0	0
1986	0	0
1987	0	0
1988	0	0
1989	0	0
1990	0	0
1991	0	0
1992	0	0
1993	1	0
1994	1	0
1995	3	2	Remembering The Nanjing-Massacre + Choy,Christine Documentary - 'In The Name Of The Emperor' (1995)	Magee,John Documentary Footage Of The Massacre Of Nanjing, China, 1937-1938																nanjing massacre； the massacre of nanjing
1996	0	0
1997	2	2	The rape of Nanking - How ''the Nazi Buddha'' resisted the Japanese【无获取方式】	The rape of Nanking - The forgotten holocaust of World War II - Chang,I 【放在1998里了】【重复】																rape of nanking
1998	5	5	The rape of Nanking: The forgotten holocaust of World War II.-Barshay【无获取方式】	The Rape of Nanking: The forgotten Holocaust of World War II	The rape of Nanking: The forgotten Holocaust of World War II.	The rape of Nanking. The forgotten Holocaust of World War II.-Lin【无获取方式】	The "Rape of Nanking"(World War II history)													rape of nanking
1999	6	6	News from Nanking (How the author helped get first-account accounts of the Rape of Nanking out of China in 1938)	The rape of Nanking (WuDunn's review of Rabe)-ChanG.I	The rape of Nanking: The forgotten holocaust of World War II-FOGEL	The Nanjing massacre: A Japanese journalist confronts Japan's national shame.-Levine	The Nanjing massacre: A Japanese journalist confronts Japan's national shame-Veale	Convergence or divergence? Recent historical writings on the Rape of Nanjing												rape of nanking； nanjing massacre
2000	9	9	The Nanking 100-man killing contest debate: War guilt amid fabricated illusions, 1971-75-Wakabayashi	Documents on the rape of Nanking.-Minear	The terror-genocide of Nanking, 1937-38 - The systematic character of Japanese war crimes-Makino【德语】	American goddess at the rape of nanking: The courage of Minnie Vautrin.-Levine	The Nanjing massacre in history and historiography.-BOYLE	The Nanjing massacre: A Japanese journalist confronts Japan's national shame.-Creighton	The Nanjing massacre: A Japanese journalist confronts Japan's national shame.-McCormack	The Nanjing massacre: A Japanese journalist confronts Japan's national shame-Yang	The Nanjing massacre in history and historiography.-Pye
2001	16	16	Isolating knowledge of the unpleasant: the rape of Nanking in Japanese high-school textbooks	Nanking: Anatomy of an atrocity	Nanking: Anatomy of an atrocity	Nanking: Anatomy of an atrocity.	Documents on the rape of Nanking	Documents on the rape of Nanking	The Tokyo judgment and the Rape of Nanking	Documents on the Rape of Nanking	Documents on the Rape of Nanking	The rape of nanking: The forgotten Holocaust of World War II	The Nanjing massacre in history and historiography.	The Nanjing massacre in history and historiography	The Nanjing massacre in history and historiography	The Nanjing massacre in history and historiography	The Nanjing massacre: A Japanese journalist confronts Japan's national shame	The Nanjing massacre: A Japanese journalist confronts Japan's national shame
2002	9	9	Eyewitnesses to massacre: American missionaries bear witness to atrocities in Nanjing.	Nanking: Anatomy of an atrocity.	Nanking: Anatomy of an atrocity	Nanking 1937: Memory and healing.	Nanking 1937: Memory and healing	Nanking 1937: Memory and healing.	The Nanjing massacre in history and historiography.	The Nanjing massacre in history and historiography	'Nanjing, December, 1937'
2003	1	1	The Nanjing massacre in history and historiography.
2004	3	2	'Reflections with memories': Everyday photography capturing genocide	Nanking 1937: Memory and healing
2005	4	2	Victims or victimizers? Museums, textbooks, and the war debate in contemporary Japan	Extreme mass homicide: From military massacre to genocide
2006	3	1	The making of the 'Rape of Nanking': History and memory in Japan, China, and the United States			Useless to the state: "Social problems" and social engineering in nationalist Nanjing, 1927-1937.
2007	7	3	The making of "The Rape of Nanking". History and memory in Japan, China, and the United States	Making of the "Rape of Nanking": History and memory in Japan, China, and the United States (A study of the weatherhead east Asian Institute, Columbia University).	Remembering the Southeast Asian Chinese massacres of 1941-45		Useless to the state: "Social problems" and social engineering in nationalist Nanjing, 1927-1937.	Useless to the state: "Social problems" and social engineering in nationalist Nanjing, 1927-1937.
2008	12	11	The Nanking atrocity 1937-1938: Complicating the picture	The Nanking Atrocity 1937-38: Complicating the Picture	The Nanking Atrocity 1937-38: Complicating the picture	The Nanking Atrocity, 1937-38: Complicating the Picture	The Nanking atrocity 1937-38: Complicating the picture	Far from oblivion: The Nanking Massacre in Japanese historical writing for children and young adults	The Rape of Nanking: 1937, one of the biggest massacres of the 20th century	RETHINKING THE NANJING MASSACRE AND ITS CONNECTION WITH THE HOLOCAUST	Let the dead be remembered Interpretation of the Nanjing Massacre Memorial	For the Nation or for the People? History and Memory of the Nanjing Massacre in Japan	The nationalist discourse in contemporary Japan: The role of China and Korea in the last decade		Useless to the state: 'Social problems' and social engineering in nationalist Nanjing, 1927-1937
2009	7	5	The Nanking Atrocity, 1937-38: Complicating the Picture.	The Nanking Atrocity 1937-38: Complicating the Picture	Memory on Trial: Constructing and Contesting the 'Rape of Nanking' at the International Military Tribunal for the Far East, 1946-1948	Waging sexual warfare: Case studies of rape warfare used by the Japanese Imperial Army during World War II	Terror in Minnie Vautrin's Nanjing: Diaries and Correspondence, 1937-38								Useless to the State: "Social Problems" and Social Engineering in Nationalist Nanjing, 1927-1937
2010	6	5	The Nanking Atrocity, 1937-38: Complicating the Picture	The Legacy of China's Wartime Reporting, 1937-1945: Can the Past Serve the Present?	Political Centres, Progressive Narratives and Cultural Trauma: Coming to Terms with the Nanjing Massacre in China, 1937-1979	The effect of essentialism in settings of historic intergroup atrocities	Historical Disputes and Reconciliation in Northeast Asia: The US Role		GENOCIDAL MUTATION AND THE CHALLENGE OF DEFINITION
2011	10	4	Writing about Atrocity: Wartime Accounts and their Contemporary Uses	REVISIONISM AND THE NANJING ATROCITY	The Woman Who Could Not Forget: Iris Chang Before and Beyond The Rape of Nanking	Telling histories of an island nation The academics and politics of history textbooks in contemporary Taiwan			Unmaking the Chinese Nationalist State: Administrative Reform among Fiscal Collapse, 1937-1945
2012	4	3	Rediscovering a massacre: The filmic legacy of Iris Chang's The Rape of Nanking	Witnessing atrocity through auto-bio-graphy: Wing Tek Lum's The Nanjing Massacre: Poems	'Raw Individualists': American Soldiers on the Bataan Death March Reconsidered
2013	4	2	A past revisited: Re-presentation of the Nanjing Massacre in City of Life and Death	The Unbearable Heaviness of Memory Nanjing to Tao Baojin and His Descendants
2014	5	0
2015	8	1	Reading ethics and the body in Geling Yan's The Flowers Of War
2016	17	9	The Living Goddess of Mercy at the Rape of Nanking: Minnie Vautrin and the Ginling Refugee Camp in World War II (1937-1938)	The Cultural Impact of the Nanking Massacre in Cinematography: On City of Lite and Death (2009) and The Flowers of War (2011)	Contested Images of Rape: The Nanjing Massacre in Chinese and Japanese Films	Popular geopolitics of Chinese Nanjing massacre films: a feminist approach	Popular geopolitics of Chinese Nanjing massacre films: a feminist approach	Nanjing 1937: Battle for a Doomed City	Humanitarian Negotiation to Protect: John Rabe and the Nanking International Safety Zone (1937-1938)	China's 'info-web': How Beijing governs online political communication about Japan	Too dark to revisit? The role of past experiences and intrapersonal constraints
2017	14	12	Diplomatic compromises between the United States and Japan during the Nanjing Massacre	The Nanjing Massacre as recorded in American sources	Historical shifts in remembering China's "Nanjing Massacre"	Remembering Nanking: historical reconstructions and literary memorializations of the Nanking Massacre	Seeking evidence: The 1984 visit to Nanjing by a Japanese investigative team and its significance	The Nanjing Massacre and the traumatic memory of Nanjing residents	Trace, incident, and testimony: The story of Amano Kozo, lieutenant of the 33rd regiment of the 16th division of Japan's China expeditionary army	Eightieth anniversary of the Nanjing Massacre: Editor's introduction	Nanjing 1937: Battle for a Doomed City	Arendt in Asia: Responsibility and Judgment in Nanjing and Hiroshima	Exploring sub-dimensions of intrapersonal constraints to visiting "dark tourism" sites: a comparison of participants and non-participants	Cultivating Power: Gardens in the Global Politics of Diplomacy, War, and Peace
2018	13	7	A failure of global documentary heritage? UNESCO's "memory of the world' and heritage dissonance in East Asia	Mediated Massacre: Digital Nationalism and History Discourse on China's Web	Retranslation as a socially engaged activity: the case of The Rape of Nanking	Witnesses to a war crime: the Nanjing Massacre - the British and US reports	Battle lines: One battle, two countries and a whole lot of opinions. We talk to people in China and Japan about what they learnt at school about the Nanjing massacre	Collective Memory in Advocating Peace. The Nanjing Incident as a case study	Architecture as Synthetic Agency: Narrative-Augmented Design in Practice				Architecture as Synthetic Agency: Narrative-Augmented Design in Practice	Cherishing Children The National Child Welfare Association in the Nanjing Decade, 1928-1937
2019	16	8	Narrativizing trauma, activating awareness: Iris Chang's The Rape of Nanking and its afterlives	Research on the Psychological Mechanism of Trauma Writing in Ha Jin's New Immigrant Novels	The texture of memory: media, trauma, and the Nanjing Massacre	Remembrance of the Nanjing Massacre in the Globalised Era: The Memory of Victimisation, Emotions and the Rise of China	International tourists' dark tourism experiences in China: the case of the memorial of the victims of the Nanjing Massacre	Peace or War? Battle of Shanghai in 1937 and China's National Strategy in the Sino-Japanese War 1937-1945	Affective Ties That Bind: Investigating the Affordances of Social Networking Sites for Commemoration of Traumatic Events	A Quantitative Analysis of Creating Genius Loci in a Museum Based on Spatial Visibility Analysis			The T/Daos shall meet: The failure and success of English transliterations of Mandarin Chinese English transliterations of Mandarin are often inconsistent, but is there even such a thing as a single Mandarin language?
2020	25	16	Romancing Atrocity Ye Zhaoyan's Nanjing 1937: A Love Story	Romancing Atrocity Ye Zhaoyan's Nanjing 1937: A Love Story	That Which Is Carved in Stone: Nanjing's Monuments and Chinese Commemoration of the Second World War	MANY DOORS TO INTERNATIONAL CRIMINAL JUSTICE	History Wars in the Memory of the World: The Documents of the Nanjing Massacre and the "Comfort Women"	Introduction: Articulating the Heritage of Punishment	CHONGQING AND NANJING - WAR, CIVIL WAR AND THE AFTERMATH: 1937-43	Heritage, Memory, and Punishment: Remembering Colonial Prisons in East Asia	Canada's "History Wars": The "Comfort Women" and the Nanjing Massacre	The "History Wars" and the "Comfort Woman" Issue: Revisionism and the Right-wing in Contemporary Japan and the U.S.	Japan's demands for reforms of UNESCO's memory of the world: the search for mnemonical security	Analysis of popular educational manga on World War II for students in Japan	The antecedents and consequences of awe in dark tourism	From mixed emotional experience to spiritual meaning: learning in dark tourism places	War memory as an independent factor in Japan's relations with neighbors: on the 75th anniversary of Japan's surrender	Foreign Friends and Problematic Heroes: Remembering a Global World War Two in Early Twenty-first Century Chinese Cinema 【China‘s war with Japan】
2021	16	10	THE INVASION OF NANKING AND TURKISH PRESS (1937-1938)	Ghost Meat Horror, Trauma, and Visceral History 【小说：The Devil of Nanking】	Deciphering the Transnational Poetics in Wing Tek Lum's The Nanjing Massacre: Poems	Nanjing Massacre in Chinese and Japanese history textbooks: transitivity and Appraisal	The Nanjing Massacre Ceramic Shoes Exhibition An Interview with Artist Wang Cheng	The affective life of the Nanjing Massacre Reactivating historical trauma in governing contemporary China	Event, Trauma, and Ethics in Wing Tek Lum's The Nanjing Massacre	Hot interpretations of difficult heritage: the Memorial Hall of the Nanjing Massacre in China	THE WAR OF TEXTBOOKS: EDUCATING CHILDREN DURING THE SECOND SINO-JAPANESE WAR, 1937-1945	Consumer Boycotts, Country of Origin, and Product Competition: Evidence from China's Automobile Market【指称】			Chinese-Language Newspapers and Diasporic Chinese Identity in Australia, 1931-1937
2022	28	14	The motif of tears: representations of activism and suffering in the Liji Alley Museum in Nanjing	From Ethical Literary Criticism to the Combination of History and Poetry: The Writing of Nanjing Massacre in Contemporary Chinese Literature and Film and Television Works	"Guilt by Association": Japanese Canadians and the Nanjing Massacre Commemorative Day	The Nanjing Massacre and the Making of Mediated Trauma Afterword	The Nanjing Massacre and the Making of Mediated Trauma Translators' Preface	The Nanjing Massacre and the Making of Mediated Trauma Preface	The Nanjing Massacre and the Making of Mediated Trauma Conclusion	Human Memories. Eyewitness Accounts and Other Evidence of the Nanjing Massacre	Human Memories. Eyewitness Accounts and Other Evidence of the Nanjing Massacre	Nanjing Massacre and the Making of Mediated Trauma	The Nanjing Massacre and the Making of Mediated Trauma Foreword	The Nanjing Massacre Memorial and Angelus Novus: Ephemera, Trauma, and Reparation in Contemporary Chinese Public Art	Negotiating cultural trauma in tourism	Emperor Hirohito's Post-Surrender Reflections
2023	16	8	To Anglicize and Angelize the Rape of Nanking	The UNESCO Memory of the World Programme and claims for recognition of atrocities: The nominations of Documents of Nanjing Massacre and Voices of the 'Comfort Women'	Public Secrets, Private Exposures: Li Ang's The Lost Garden and Ye Zhaoyan's Nanjing 1937: A Love Story	Nanking 1937: literature as memory	Soft and resilient: When embroidery encounters narrating the Nanjing Massacre in the Memorial Hall	Standing in Solidarity: British Women and the China Campaign Committee, 1937-1945	Objectification, Bodily Revenge, and National Identity: Refashioning 'Comfort Women' in Chinese Cinema	Portrayal of the national identity in Chinese language textbooks			Ankara in Chinese Imagination: Turkish Capital and Its Influence on 'Temporary Capital' Chongqing 【事件表征】
2024	5	3	The reproduction of imagination: how do non-experiencers remember history?	The reproduction of imagination: how do non-experiencers remember history?	Choreographing Social Memories: Healing and Collective Imagining in Eiko Otake and Wen Hui's Artistic Collaboration
总数	277	176
	nanjing massacre (主题) OR rape of nanking (主题) OR nanking incident (主题) OR nanking atrocities (主题) OR nanjing atrocities (主题) OR rape of nanjing (主题) OR nanjing incident (主题) OR nanjing atrocity (主题) OR nanjing 1937 (主题) OR nanking 1937 (主题) OR nanking atrocity (主题) 的结果
	1900-2024

## Sheet: Proquest数据库
年份	PROQUEST	有效	wos有效	合计	文章信息
1937	0	0		0
1938	7	5		5	WHAT WAR MEANS (In America: THE JAPANESE TERROR IN CHINA).	A State of Hostilities Exists	The War in China Continues.	What Else Could China Do?: Letter to a Pacifist Chinese Friend	Return to Japan: Observations after Fourteen Months Absence
1939	1	1		1	Damage in the Nanking Area, December 1937-March 1938
1940	3	1		1	Communion in Nanking		报纸不算
1941	0	0		0
1942	5	2		2	American war documents--Cordell Hull's Radio Address of July 23	Pearl S. Buck, Dragon seed (Book Review)
1943	1	0		0
1944	0	0		0
1945	2	1		1	The Japanese High Command (Part I)
1946	3	2		2	Tolischus, Through Japanese Eyes (Book Review)	Japan and the Japanese. (lecture) February, 1946
1947	8	0		0
1948	1	0		0
1949	2	0		0
1950	2	0		0
1951	2	0		0
1952	1	1		1	Japan's War in China: An Ideological Somersault.
1953	5	0		0			赵氏孤儿	德语	法语
1954	5	0		0
1955	1	1		1	Literature and Politics in the Japanese Magazine, Sekai
1956	0	0		0
1957	4	0		0
1958	1	0		0	Impressions of China Since the War【无关】
1959	1	0		0
1960	1	0		0
1961	1	0		0
1962	2	0		0	Peking and the West【无关】
1963	1	0		0
1964	2	0		0			八路军农村包围城市
1965	5	1		1	COOX, "Year of the Tiger" (Book Review)		高度关注中国的政治制度、共产主义、政治思想的起源、农村社会结构等
1966	3	0		0			二战期间轰炸与美国良心	中苏冲突	红军长征：事实与想象
1967	4	0		0
1968	1	0		0
1969	5	0		0			1895年四川暴动与美国“传教外交”
1970	2	0		0
1971	2	0		0	NOTES ON JAPANESE HISTORIOGRAPHY: WORLD WAR II（无关）		The Chinese Student Movement of 1945-1949
1972	2	1		1	Bergamini "Japan's Imperial Conspiracy" (Book Review)
1973	10	2		2	Payne "Massacre: The Tragedy at Bangla Desh and the Phenomenon of mass slaughter throughout history	MAO'S PROTRACTED WAR: THEORY VS. PRACTICE【用做例子】
1974	4	0		0
1975	4	0		0
1976	3	0		0
1977	2	0		0			America and East Asia Paton Davies,文章中细致梳理了1919-1949美日中的冲突史，却只字未提南京大屠杀
1978	3	0		0			Mao's Mr. America: Edgar Snow's Images of China
1979	0	0		0
1980	5	0		0
1981	8	1		1	Communications to the Editor: Concerning Japanese Fascism
1982	4	0		0
1983	4	1		1	MURAKAMI, "Japan: The Years of Trial, 1919-52" (Book Review)
1984	6	1		1	The Protestant Endeavor in Chinese Society, 1890-1950: Gleanings from the Manuscripts of M. Searle Bates
1985	2	0		0
1986	6	3		3	The Patterns of Japanese Relations with China, 1952-1982	The Development of Sino-Japanese Relations	Hyoe Murakami,Japan: The Years of Trial,1919-52.Tokyo:Kodansha,Interna- tional,1983.246pp. $US 8.50.
1987	3	2		2	My Pilgrimage in Mission	The Tokyo War Crimes Trial edited by Chihiro Hosoya et al. (Book Review)
1988	5	1		1	BOOK REVIEWS-Saving Cbina: Canadian Missionaries in tpe Middle Kingdom,1888-1959. ByAlvyn J. Austin. (Buffalo, New York: University ofToronto Press. 1986. Pp. xvii395.827.50.)
1989	3	0		0
1990	5	2		2	WHITING, "China Eyes Japan" (Book Review)	FOGEL, "Nakae Ushikichi in China: The Mourning of Spirit" (Book Review)	普通日本学者对于南京大屠杀的认知
1991	12	5		5	The Clausewitzian Universe and the Law of War【违反战争法举得一个例子】【战争伦理】	Contemporary Images of Japan: My Students as Texts, My Students as Readers	Edward Behr. "Hirohito: Behind the Myth" (Book Review)	Larry Azar: "Twentieth Century in Crisis" (Book Review)	The Scholarship on World War II: Its Present Condition and Future Possibilities【非主题】【学术研究：对比其他事件】										Japanese biological warfare experiments and other atrocities in Manchuria, 1932-1945, and the subsequent United States cover up: a preliminary assessment
1992	4	2		2	SEKIGUCHI, "Senso Daughters"	Japanese Emperor's Visit to China Sends Important Signals to the United States													Expressing and Assessing Understanding Through the Arts【绘画形式表达南京大屠杀主题】
1993	5	5		5	IRITANI, "Group Psychology of the Japanese in Wartime" (Book Review)	CHINA'S BITTER VICTORY: The War with Japan, 1937-1945. Edited by James C. Hsiung and Steven I. Levine (Book Review)	MITCHELL, "Janus-Faced Justice: Political Criminals in Japan" (Book Review)	Rape In Wars: Analytical Approaches	Soldiers of the Sun: The Rise and Fall of the Imperial Japanese Army by Meirion Harries and Susie Harries (Book Review)
1994	9	4		4	war guilt in Japan and Germany【书评】	Is Japan a military threat to Asia?	Stephen S. Large. "Emperor Hirohito & Showa Japan" (Book Review)	EDWNP. HoYT, Hirohito: The Enperor ud the Ma. New York: Praeger,1992.2【书评】											【Chronology年表里提及日本首相因否认南京大屠杀引咎辞职】Only 10 days after forning his cabinet Prime Minister Hata Tsutomu accepts the resignatian of Minister of Justice Nagano Shigeto and names Nakai Hiroshi to replace him, Nagano was compelled to resign amid mounting criticism both at home and abroad for his remarks that the 1937 Rape of Nanking was a fabrication and that the Pacific War was not an act of aggression.
1995	15	9	2	11	From the Opium War to the Pacific War: Japanese Propaganda Films of World War II'【案例】【非主题】	Women's Voices, Women's Pain【慰安妇】	History -- The Comfort Women: Sex Slaves of Japan's Imperial Forces	Smithsonian Suffers Legionnaires' Disease【非主题】【欧美人视角会存在为开解广岛长崎而拿菲律宾和南京大屠杀说事攻击日本】	Why do Ruling Classes Fear History?【非主题】【篡改教科书抹杀南京大屠杀】	History and the culture wars: The case of the Smithsonian Institution's Enola Gay exhibition【非主题】【引用了smithsonian同一段话】	Women, War and Rape: Challenges Facing the International "Tribunal for the Former Yugoslavia"【非主题】【慰安妇】	The Maruki Legacy 【日本艺术家创作南京大屠杀主题壁画】	Bemslein.B.J.1995.The atomic bomb reconsidered. Foreign Affairs 74:151-52.						【讨论二战后道德的重新定义，引起道德观变化的事件包括广岛长崎、德国屠犹、南京大屠杀】The Atomic Bombings Reconsidered
1996	9	3	0	3	Pillar of Cloud and Pillar of Fire	Explaining Auschwitz and Hiroshima: History Writing and the Second World War 1945-1990【非主题】	Senso: The Japanese Remember the Pacific War												Pictures of the enemy: Fifty years of images of Japan in the American press, 1941-1992【美国出版业对日本形象塑造的变化，提及了南京，说美国为抹黑日本形象而强调日本在亚洲的暴行】【so？？？？？？？】
1997	15	7	0	7	Remembering Hiroshima: Cultural Politics, World War II and American Consciousness	The A-bomb dome as World Heritage	Massacre and rape in Hong Kong: Two case studies involving medical personnel and patients【主题性】	Japanese Anti-Semitism: Conjuring Up Conspiratorial Jews in a Land Without Jews【非主题】	Shriver's "Ethic for Enemies": Implications for business research【只提及】【南京大屠杀作为美国投放原子弹合理化的借口之一】	Han-laden women: Korean "comfort women" and women in Judges 19-21【只提及】【韩国慰安妇主题】	From the People of the United States of America: The Books for China Programs during World War II【非主题】【抗战期间书籍情况】								The rape of Nanking: how 'the Nazi Buddha' resisted the Japanese【Gluck】【没原文】
1998	24	9	0	9	Memories of War Crimes in Asia and Europe: A Review Article【非主题】	The Rape of Nanking: The Forgotten Holocaust of World War II / Japan's War Memories: Amnesia or Concealment?【主题】【重点】	Reassessing Truman, the bomb, and revisionism: The burlesque frame and entelechy in the decision to use atomic weapons against Japan【非主题】【南京大屠杀作为原子弹借口】	Sushi South: Teaching Southern Culture in Japan【非主题】【日本社会对南京大屠杀的感受】	The forgotten holocaust--Kreuter【书评】	Rude Awakenings: Zen, the Kyoto School and questions of nationalism【非主题】【以南京大屠杀来揭穿日本解放亚洲、大东亚共荣圈的的谎言】	The Rape of Nanking: The Forgotten Holocaust of World War II / Rape of Nanking: An Undeniable History in Photographs--Schell【书评】	The Rape of Nanking: The Forgotten Holocaust of World War II--Zagoria【书评】	The Rape of Nanking. BY IRIS CHANG.New YorkBasic Books,1997. 304 pp.$25.00Cloth. Reviewed by Dr.Liang Chi Shen and Michael Koping Shen.【书评】						Japanese textbook treatment of the Nanking Massacre【没原文】【Japan echo】											The Nanking Massacre in print: A recent bibliography【没原文】【Japan echo】	The Nanking atrocities: Fact and fable【没原文】【Japan echo】
1999	31	11	2	13	Review essay. Transplanting foreign norms: human rights and other international legal norms in Japan 【评论文章：移植外国规范:日本的人权和其他国际法律规范】【非主题】	The contemporary law of superior responsibility【战争法，涉及东京审判松井石根的战争罪责】	The Politics of Memory: Nation, Individual and Self	Peacemakers in China: American Missionaries and the Sino-Japanese War, 1937-1941【历史研究】【传教士】	Japanese Diplomats and Jewish Refugees【非主题】【日军对犹太人如此好不可能犯下南京大屠杀的暴行】	A Diary of Darkness: The Wartime Diary of Kiyosawa Kiyoshi【书评】	Selective Justice: Prosecuting Rape in the International Criminal Tribunals for the Former Yugoslavia and Rwanda【非主题】【战争中的强奸罪没有得到审判】	Casual slaughters, accidental judgments【非主题】【加拿大司法在东京审判中的作用】	Historians and Public Memory in Japan: The "Comfort Women" Controversy; Introduction-sand	Challenges of Trans-National History: Historians and the Nanjing Atrocity【主题】	Can Tojo Inspire Modern Japan?
2000	51	22	5	27	The Nanjing Massacre in History and Historiography-BOYLE【书评】	Judging War Criminals: The Politics of International Justice by Yves Beigbeder (Book Review)【非主题】【司法理性】	Psychological propaganda: The war of ideas on ideas during the first half of the twentieth century【非主题】	The crime of the century? The case for the Holocaust【只提及】【南京大屠杀的惨烈程度不亚于犹太大屠杀】	Revenge and recapitation in recessionary Japan	Okinawa's frustrating base burden【非主题】【日本文部省篡改教科书，不止涉及南京大屠杀，也涉及冲绳事件】	National subjectivity and the uses of atonement in the age of recession【主题性】	World War II in social studies and science curricula	Japan's historical myopia【主题性】	Nanking: Anatomy of an Atrocity: Reviews of New Books-Mosher【书评】	Japanese atrocities in the Pacific War: One Army surgeon's account of vivisection on human subjects in China	The difficulty of apology【主题性】	The Nanjing Massacre in History and Historiography: Reviews of New Books-Reynolds【书评】	The Pied Piper of Hamelin: Folklore Encounters Malevolent Cults	The Spawning Grounds of the Japanese Rapists of Nanking【主题】	From imperial gifts to sex slaves: theorizing symbolic representations of the 'comfort women'	The Nanjing massacre: a review essay-Tucker【综述了这段时间出版的多本专著】	The Nanking 100-man killing contest debate: War guilt amid fabricated illusions, 1971-75-Wakabayashi【书评】	Women Against the Good War: Conscientious Objection and Gender on the American Home Front, 1941-1947	The Nanjing Massacre: The socio-psychological effects【张连红-中国学者】	Walking the Tightrope of Ambiguity (Book Review)【在语义的模棱两可间走钢索】	American Goddess at the Rape of Nanking: The Courage of Minnie Vautrin-Hu Hualing-zheng guohe【书评】			COMING UP: "The Wounded Dove"【纪录片的宣传海报】【和平议题】新冠期间，南京给德国捐献物资	Dys-appearing tongues and bodily memories: The aging of first-generation resident Koreans in Japan【脚注中提及了南京事件】【日韩第一代记忆者逐渐老龄化而势必面临对曾经伤害的失语与失忆】
2001	40	18	7	25	The complexity of evil	Race, tribe, and power in the heart of Africa【非主题】【把日本人归类在“文明的白人”里了】	Judith M. Bennett and Amy M. Froide (eds.), Singlewomen in the European past, 1250-1800. (Philadelphia: University of Pennsylvania Press, 1999.) Pages 304. £37.95; £15.50 (paperback).【书评】	Interview with Yue-Him Tam, president of global alliance【访谈】	Nanking: Anatomy of an Atrocity--Fogel【书评】	The Nanjing massacre in history and historiography --Leutner【书评】	Everything Old Is New Again: The Use Of Gender-Based Terrorism Against Women【非主题】	Family therapy saves the planet: Messianic tendencies in the family systems literature【非主题】【慰安妇制度与禅宗？】	The Mens Rea of Superior Responsibility as Developed by ICTY Jurisprudence【国际法】【上级不作为罪】	Textbook history repeats itself【教科书】【称南京大屠杀是由于中国军队的剧烈抵抗导致的】	From the editor【编者语】txt	Victor's justice and Japan's amnesia: The Tokyo War Crimes Trial reconsidered【战争审判】	An unwelcome visit from the uyoku	Mark Levene and Penny Roberts (eds.), The massacre in history【书评】	On the importance of getting even: A study of the origins and intention of revenge【非主题】【复仇心理】【非我族类其心必异】	Nanking: Anatomy of an Atrocity--Wilkinson【书评】	Documents on the Rape of Nanking--Yamamoto【书评】	Documents on the Rape of Nanking.--Lary【书评】
2002	37	18	3	21	Nanking 1937: Memory and Healing edited by FEI FEI LI--RICHARD H. MINEAR【书评】	War crimes against women【书评】【例证】	Eyewitness to Massacre: American Missionaries Bear Witness to Japanese Atrocities in Nanjing	Scars of War: The Impact of Warfare on Modern China	Nanking 1937: Memory and Healing--Desnoyers【书评】	PROSECUTING RAPE AS A WAR CRIME【非主题】	Contested memories of the imperial sun: History textbook controversy in Japan【主题性】	The Acquisition of Beliefs that Promote Subjective Well-Being【非主题性】【举例：张纯如书中提到？日本人一开始不愿屠杀但最后导致残暴的结果】	Us versus them, or us versus everyone? Delineating consumer aversion to foreign goods	Prosecuting Crimes Of Sexual Violence In An International Tribunal	The apology issue: Japan's differing approaches toward China and South Korea	Racism in the Service of Civil Rights: DuBois in Germany, China, and Japan, 1936-37	Nanking 1937: memory and healing--ZHANG KAIYUAN and LIU JIAFENG【书评】	Nanking: Anatomy of an Atrocity / The Nanjing Massacre in History and Historiography--Matsusaka【书评】	China's Trial By Fire: The Shanghai War of 1932 / Eyewitnesses to Massacre: American Missionaries Bear Witness to Atrocities in Nanjing	Review article: The second world war【记忆政治】	Denying History: Who Says the Holocaust Never Happened and Why Do They Say It?【书评】	Jehovah's witnesses and the empire of the sun: A clash of faith and religion during World War II【新法案延长了南京大屠杀受害者向日本所求赔偿的追诉期，延长至2010年】
2003	37	22	1	23	Representing history in Amy Tan's The Kitchen God's Wife	Unreconstructed Democracy: W. E. B. Du Bois and the Case for Reparations【战争赔偿】【国家失忆症】【记忆压制】【人权】	making sense of the senseless: understanding genocide【理解无意义:理解种族灭绝】	Entangled memories: Versions of the past in Germany and Japan, 1945-2001	A lost war in living memory: Japan's Second World War【重点文献】【日本人的二战史记忆】	Re-visiting Hiroshima: The Role of us and japanese history textbooks in the construction of national memory【重点文献】	Ghost Soldiers: The Forgotten Epic Story of World War II's Most Dramatic Mission【书评】	The Rememberance of the Holocaust as a Catalyst for a Transnational Ethic?【举例，认为南京是self-explicatory symbols】	Rumbly in the tumbly【段落】	Justice and Peace: The Importance of Choosing Accountability Over Realpolitik*	Franklin D. Roosevelt, the holocaust, and modernity's rescue rhetorics【冷漠的盟友】【美总统罗斯福知晓德日暴行却不作为】	Mapping a graphic genome: A cross-cultural comparison between Korean and Japanese designers【有效脚注】【副文本】	Old ghosts, new memories: China's changing war history in the era of post-Mao politics	Perilous Memories: The Asia-Pacific War(s)-Poyer【书评】	The Tragedy of International History【主题小节】	The World of Atonement: Reparations for Historical Injustices【硕博论文？】【有相关讨论】	Popular representations of the past: The case of postwar Japan【否定派观点】	Politics Of The Victim/Victor Complex: Interpreting South Korea'S National Furor Over Japanese History Textbooks【主题讨论日韩战后记忆问题】【有效脚注】	War and Modernity【书评】	Let's Take that From the Beginning Again...【访谈】【提及针对平民的暴行及伦理】【, the massacre at Nanking is a monstrosity】	The Victim as Hero: Ideologies of Peace and National Identity in Postwar Japan【书评】	The rule of law in times of stress【与犹太大屠杀并列提及】【二战结束后，新联合国秘书长通过了《世界人权宣言》】				Skin color as post-colonial hierarchy: A global strategy for conflict resolution【引用了张纯如】【种族主义】	Clash of civilizations: Prophecy or contradiction in terms?【将敌人视作非人化导致的暴行肆虐】【他者化可能带来的灾难】【种族问题】
2004	74	24	2	26	Imperialism, crime and criminology. Towards the decolonization of criminology【后殖民主义时代】【犯罪学从个人罪刑的发展】【张纯如的贡献】	The Shame Of Hwang V. Japan: How The International Community Has Failed Asia'S "Comfort Women"【慰安妇问题】	New Research on the Nanjing Incident【重点文献】【主题】	The Sun Sets on the West【世界历史教科书中鲜有提及日本战争罪行的】	Language, Ideology and Japanese History Textbooks. By Christopher Barnard. pp. x, 190. London & New York, RoutledgeCurzon, 2003.【书评】	The Sino-Japanese War of 1894-1895: Perceptions, Power, and Primacy【书评】	Explaining Wartime Rape	WARTIME: A LATE MEMOIR: [1]	Making Democracy Safe for the World	Books, articles, and items of academic interest【世界历史教科书忽略日本侵华史】	Initial Truth Establishment by Transitional Bodies and the Fight against Denial【篡改历史的例子比比皆是，举了南京大屠杀】	Survival in Margaret Atwood's Novel Oryx and Crake【日本南京大屠杀中杀死的人比广岛长崎的多，更少受责难因为手段原始】	Apologies for Atrocities: Commemorating the 50th Anniversary of World War II's End in the United States and Japan	Return to What One Imagines to Be There: Masculinity and Racial Otherness in Haruki Murakami's Writings about China: a Forum on Fiction【村上春树作品分析】【脚注10】【日本不愿面对的历史】	Claudia Card's Atrocity Paradigm【把rape单独理解为强暴】	The Reluctant Asianist: Japan and Asia	New Forms of Conflict and Violence Sexual Violence and International Law【非主题】【性暴力与国际法】	Confronting an Ugly Past【主题】	RAPE AS A SOCIAL CONSTRUCT: A COMPARATIVE ANALYSIS OF RAPE IN THE BOSNIAN AND RWANDAN GENOCIDES AND U.S. DOMESTIC LAW【非主题】【战争中士兵强奸妇女的例子】	Steven Spielberg and the Holiness of War	The Concept of Evil【主题】【借言】	Pearl Buck's "Several Worlds" and the "Inasmuch" of Christ【赛珍珠】【在南京大屠杀中的参与】	Eyes off the Prize: The United Nations and the African American Struggle for Human Rights, 1944-55: a Journal for Readers, Students and Teachers of History【并置犹太大屠杀和南京大屠杀】	FORGOTTEN MAN REMEMBERED【美国民众要有人道主义使命感】【拒绝平庸之恶】		Japan-Taiwan Relations: Between Affinity and Reality【脚注34】【日台关系】	经济学人对张纯如的报道【张纯如于2024年11月9日自杀】
2005	26	12	0	12	Women and War: A Critical Discourse【主题研讨会第三名学者发言】【东京审判的关于强奸暴行的举证】	Carta blanca【作者出于愤怒书写暴行】【美军的反思在伊拉克等地的行为类似于日军侵华】	Extreme mass homicide: From military massacre to genocide【专题小节】【重点文献】	China's "New Thinking" on Japan【仇日情绪】	Victims or Victimizers? Museums, Textbooks, and the War Debate in Contemporary Japan【重点文献】	Will the Real Japan Please Stand Up	Modernity, Internationalization, And War In The History Of Modern China	Twilight of the Gods: Britain, America, and the Inheritance of Empire【大英帝国殖民时期的行为与南京大屠杀进行类比】	WOMEN IN THE MIDST OF WAR: A QUARTERLY OF WOMEN'S STUDIES RESOURCES【书评】	The Yasukuni Shrine Dispute and the Politics of Identity in Japan: Why All the Fuss?	Genocide and Settler Society: Frontier Violence and Stolen Indigenous Children in Australian History【书评】	MacDonald, David. 2005. “Forgetting and Denying: Iris Chang, the Holocaust and the Challenge of Nanking.” International Politics 42 ~4!: 403–427.														【新闻报道】纪念张纯如，在其自杀后One final victim of the Rape of Nanking?	The Black Pacific: Cuban and Brazilian Echoes in the Afro-Peruvian Revival【脚注13：Iris Chang researched and published The Rape of Nanking: The Forgotten Holocaust of World War II(1997) to fight the erasure of the Japanese massacre of the citizens of Nanking, China from historical memory.】	Nationalism, Indignation and China's Japan Policy 【脚注16：In Republican China, playwrights like XiaoJun used rape in nationalist plays such as, Village in August, in which Japanese soldiers rape a patriotic peasant woman. The return of the"rape of China" theme in late 1990s China may be seen in such bestsellers as Chinese American Iris Chang's 1997 The Rape of Nanking.】	【新闻报道】The deepest of wounds.	."Basic Facts on the Nanking Massacre and the Tokyo War Crimes Trial,"htp:/ /www.arts.cuhk.edu.hk/NanjingMassacre/NMNJ html (accessed 28 August 2004); M. Cheif Bassiouni,"Combating lmpurity for International Crimes,"Uninesity f Colorado LaoRevie 71(2000):415.
2006	55	9	1	10	Indonesia dalem Api dan Bara (Indonesia in Fire and Embers). By Tjamboek Berduri. Jakarta: Elkasa, 2004. Pp. xii + 371. Photos pp. 375–98. Reviewed by Mona Lohanda,3 National Archives, Jakarta, Indonesia【书评】	They Were in Nanjing: The Nanjing Massacre Witnessed by American and British Nationals【书评】	Beyond Tolerance: Teaching English in a Post-9/11 Classroom	Individual and Collective Guilt: Post-War Japan and the Tokyo War Crimes Tribunal【东京审判】	From British Empire to American Colossus【书评：EMPIRE: HOW BRITAIN MADE THE MODERN WORLD】	The China-Japan War, 1931-1945【重点文献】	The Banal Nationalism of Japanese Cinema: The Making of Pride and the Idea of India	The Globalization of Human Rights: Violence, New Wars and Failed States	The Price of Arrogance: Our Problems with Understanding World Cultures																	【新闻报道】Schindler of Nanjing.	Development, democracy, and mass killings【死亡人数；20万】【出处Charny, I. (Ed.) (1999). Encyclopedia of genocide (Vols. I and II). A B C-CLIO Incorporated.】
2007	32	20	6	26	Correspondence: A Monthly Journal Of Religion And Public Life	From Marco Polo Bridge To Pearl Harbor: Who Was Responsible?【战争责任】	On Discreteness: Event and Sound in Poetry【诗歌中的南京大屠杀】	Trauma and Community: The Visual Politics of Chinese Nationalism and Sino-Japanese Relations【重点文献】	Speaking Truth to Power: Women's Rights as Human Rights: a Journal for Readers, Students and Teachers of History【性奴役举例】	Why Not Kill Them All? The Logic and Prevention of Mass Political Murder【将南京大屠杀归因为复仇】【有事实根据吗】	Remembering and Forgetting the War: Elite Myth making, Mass Reaction, and Sino-Japanese Relations, 1950-2006【重点文献】	The Japanese history textbook controversy: a content analysis【历史教科书争议】	Gender Justice or Just Gender? The Role of Gender in Sexual Assault Decisions at the International Criminal Tribunal for the Former Yugoslavia*【强暴女性的战争罪行举例】	The Construction of Military Prostitution in South Korea during the U.S. Military Rule, 1945-1948【战争性奴隶制度的建立】	The Maoist Legacy of Modern China	CHINA AND LASTING FRIENDSHIP WITH THE DISCIPLES OF CHRIST【重点文献】	Several Steps Sideways: International Legal Developments Concerning War Rape And The Human Rights Of Women【事件指称rape的解释】【非主题】	The Making of the "Rape of Nanking": History and Memory in Japan, China, and the United States【书评】	Land of the Setting Sun	America's Policy toward East Asia: How It Looks from Japan	Sexual Violence Against Men in Armed Conflict【针对男性的性暴力行为】	China Perspective--Editorial【编者语：南京大屠杀70周年】	Sounding Eyes: Mina Loy's Acoustic Subjectivity in "The Song of the Nightingale is Like the Scent of Syringa"【南京大屠杀主题诗歌】	Book Reviews-【日本对中国人的反感导致的南京大屠杀】【中日文化角度解读】						World War II Japanese War Crimes L’armée de l’empereur. Violences et crimes du Japon en guerre (1937–1945). Jean-Louis Margolin. Préface d’Yves Ternon. Paris: Armand Colin, 2007. 480 pp. Euro25.【书评】【法国出版了一本介绍南京大屠杀的书】Thomas Wieder. Le Monde des Livres, Apr. 27, 2007: 9.	The Asiatic side of World War II is largely unknown in France, hence the interest of a book that reveals, at times ad nauseam, the atrocities committed by the Japanese army during World War II, and before—the sack of Nanking in December 1937 remaining the absolute symbol of the criminal character of Japanese warfare.	Rejecting the concept of “Japanese murderous atavism,” Margolin proposes two causes to that wild-beast-like warfare: (a) the spirit of sacrifice deriving from the cult of the Emperor, and the extolling of the army as the “cement of the nation”; and (b) the inferiority of the Empire in arma­­ ments and logistic means, which at times obliged the soldiers to fight with knives in an anxiety-creating …	在法国，人们对第二次世界大战亚洲战场的情况大多一无所知。 这本书有时不厌其烦地揭露了日军在二战期间和二战之前--南京大屠杀--所犯下的暴行。 1937 年 12 月南京大屠杀仍然是日本战争罪恶性质的绝对象征。 马戈林摒弃了 "日本人杀人成性 "的概念，他提出了导致日本人杀人成性的两个原因。 马戈林认为，野兽般的战争有两个原因： (a) 源于对天皇崇拜的牺牲精神，以及对军队作为 "国家基石 "的赞美 (b) 帝国在武器装备和后勤手段方面的劣势，这迫使士兵们有时不得不在一种有利于最恶劣勒索行为的焦虑环境中持刀作战。	【新闻报道】Release of Arc hives Helps Fill Gap in Files on Wartime Atrocities	Seeking gender justice in post-conflict transitions: towards a transformative women's human rights approach【有效脚注2】【东京审判对于强奸罪的审判不足】
2008	25	17	4	21	CHINA MAGIC: AMERICA'S GREAT REALITY HIATUS, 1948-73 【中国魔法：美国的巨大现实裂隙】	Japan's Contested Memories: The 'Memory Rifts' in Historical Consciousness of World War II【书评】	Memory and History in Germany【反例：日本没有像德国一样的直面罪行】	Crime prevention and control: Western beliefs vs. traditional legal practices【系统性施加在平民身上的身体与心理暴力背后是由系统和情境因素导致的】【举例】	The Seven Phases of Going to War【提及】	The how of history: using old and new textbooks in the classroom to develop disciplinary knowledge【日本历史教科书会蔓延道国际政治方面】	Sino-Japanese relations: The ice that won't melt【仇日情绪】	Border Literary Histories, Globalization, and Critical Regionalism【多次提及】	The Nanking Atrocity: Complicating the Picture: Reviews of New Books--McNally【书评】	The Nanking Atrocity 1937-38: Complicating the Picture-Mitter【书评】	Right Angles: Examining Accounts of Japanese Neo-nationalism	Japan's Sino-Pacific war: a conflict unplanned, lacking both means and foresight?	The Nanking Atrocity 1937–38: Complicating the Picture--Caroline Rose【书评】	Just War and the Problem of Evil【没有直接引用张纯如，但构成互文】	THE NANKING ATROCITY 1937-38: Complicating the Picture-Smith（书评）	The Politics of Identity and Sexual Violence: A Review of Bosnia and Rwanda【战争性暴力】【这里面这一段文字也眼熟在那儿看过】	Finding Iris Chang: Friendship, Ambition, and the Loss of an Extraordinary Mind: 【书评】
2009	35	23	7	30	A sense of self-perceived collective victimhood in intractable conflicts【指称：the 1937 massacre of Chinese in Nanking】【举例】	The Tokyo War Crimes Trials: The Pursuit of Justice in the Wake of World War II【书评】	From Victory to Victimization【1949后的连环画中对于南京大屠杀和中日战争的描绘】	Seeking Accurate Cultural Representation	War Crimes and Genocide in History, and the Evolution of Responsive International Law	Mining The Intersections: Advancing The Rights Of Women And Children With Disabilities Within An Interrelated Web Of Human Rights【引用张纯如】	Film Reviews: "Nanjing: Memory and Oblivion"【影评】	Contemporary conservative thoughts in Japan: conservative views on morality, history, and social issues【日本人对民族历史没有自豪感】	Atrocities and confrontational tension【有效脚注6】【引用张纯如】【moral holiday】	Canadian Theatre of War【剧评】	Indigenization of the Holocaust and the Tehran Holocaust Conference: Iranian Aberration or Third World Trend?	Rape with Extreme Violence: The New Pathology in South Kivu, Democratic Republic of Congo【大屠杀中的性暴力】	Ethno-Cultural and Linguistic Transference and Countertransference: From Asian Perspectives【亚洲传统文化移情与反移情】	Patriotism, War, and the Limits of Permissible Partiality	Review: The End of the Pacific War: Reappraisals【书评】【仅提及】	The Destructive Power Of Religion: Violence In Judaism, Christianity, And Islam【认为历史上的大屠杀等暴行是源于DNA基因缺陷】	FREEDOM'S BATTLE: The Origins of Humanitarian Intervention【书评】	WHY NOT KILL THEM ALL? THE LOGIC AND PREVENTION OF MASS POLITICAL MURDER【书评】【事件写成1837年】【重大错误】	Books That Inspire, Books That Offend【评价张纯如的书】	The Trajectory of Perpetrators' Trauma: Mnemonic Politics around the Asia-Pacific War in Japan【重点文献】	Old Wounds, New Narratives: Joint History Textbook Writing and Peacebuilding in East Asia【教科书争议】	The Jacquinot Safe Zone: Wartime Refugees in Shanghai【南京安全区失败的原因】	Rationalization, Overcompensation and the Escalation of Corruption in Organizations: JBE【暴力行为的合理化】【社会伦理学-阿伦特】
2010	23	13	7	20	Remembrances of Empires Past	Sexual Violence beyond Reasonable Doubt: Using Pattern Evidence and Analysis for International Cases【超出合理怀疑的性暴力:国际案件的模式证据与分析】	Anglicising Psychoanalysis Innocently	Book Review: Japan's Imperial Army: Its Rise and Fall, 1853-1945【书评】	Pedagogy of Democracy: Feminism and the Cold War in the U.S. Occupation of Japan	THE TOKYO WAR CRIMES TRIAL: The Pursuit of Justice in the Wake of World War II	Japanese Political Studies in China: Progress, Problems and Prospects	Music from a Dying Nation: Taiwanese Opera in China and Taiwan during World War II【亡国调】	Institutionalized Hegemonic Masculinity and Rape by United States Army Personnel in South Korea: A Perspective on Military Subculture【引用张纯如】	The Security Council on women in war: between peacebuilding and humanitarian protection	History, Nationalism and Face in Sino-Japanese Relations【主题性】	Lost in translation: UN responses to sexual violence against men and boys in situations of armed conflict	The Imperial Cruise: A Secret History of Empire and War-Skidmore【书评】
2011	34	18	1	19	The Shadow	Scorched Earth【陆川电影的争议】	THE SEARCH FOR RAPISTS' "REAL" MOTIVES【强奸者的真实动机】【有一段提及南京大屠杀】	Broken Tongues: Race, Sacrifice, and Geopolitics in the Far East in Vsevolod Ivanov's Bronepoezd No. 14-69	The Big Run River-【齐邦媛-巨流河】【书评】	Writing about Atrocity: Wartime Accounts and their Contemporary Uses	Issues In The Development, And Enforcement, Of International Humanitarian Law: A Primer	Mobilizing the Will to Prosecute: Crimes of Rape at the Yugoslav and Rwandan Tribunals【引用张纯如】	I Want to Be Human: A Story of China and the Human【主题性】	Book Reviews：The Man Who Loved China, by Simon Winchester.【书评】	China in World War II, 1937-1945: Experience, Memory, and Legacy	The Problem of Changing Language Communities: Veterans and Memory Writing in China, Taiwan, and Japan	Terrorism's Evolution: Yesterday, Today, and Forever	Remember History, Not Hatred: Collective Remembrance of China's War of Resistance to Japan【重点文献】	The Chinese People at War: Human Suffering and Social Transformation, 1937-1945--Schoppa【书评】	Revisiting the Wound of a Nation: The "Good Nazi" John Rabe and the Nanking Massacre	RECONCILIATION AND THE REMAKING OF ANARCHY【多书书评】【战争记忆与战后和解】	Evolution and Rape: A Feminist Darwinian Perspective【引用Brownmiller 1975】
2012	17	15	4	19	SUPERIOR RESPONSIBILITY AND THE PRINCIPLE OF LEGALITY AT THE ECCC	Dangerously Smooth Spaces in Cynthia Shearer's The Celestial Jukebox	Shanghai-Madrid Axis'? Comparing British Responses to the Conflicts in Spain and China, 1936-39	A Mission under Duress: The Nanjing Massacre and Post-Massacre Social Conditions Documented by American Diplomats【书评】	The Chinese People at War: Human Suffering and Social Transformation, 1937-1945【书评】	Between Global Fears and Local Bodies: Toward a Transnational Feminist Analysis of Conflict-Related Sexual Violence【引用yoshida】	Transitional processes culminating in extreme violence【引用张纯如】	A Deliberative Approach to Northeast Asia's Contested History【东北亚争议历史】	Child Murder in Nazi Germany: The Memory of Nazi Medical Crimes and Commemoration of "Children's Euthanasia" Victims at Two Facilities (Eichberg, Kalmenhof)	Rediscovering a massacre: the filmic legacy of Iris Chang's The Rape of Nanking【主题性】	The Narration and Visualization of Rape and the Inadvertent Subversion of the Anti-War Message in Brian De Palma's Redacted and Casualties of War【南京大屠杀主题电影】	Seoul and Nanking, Baghdad and Kabul: A Response to Timothy Brook and Michael Shin【主题性】	Educating for Nationhood: A Semiotic Reading of the Memorial Hall for Victims of the Nanjing Massacre by Japanese Invaders【多条有效脚注】	Autocracy and coups d'etat	The Prophetic Role of Religion in Strengthening Cultural Construction											【新闻报道 】The method man putting Batman behind him.
2013	21	16	3	19	THE 1994 RWANDAN CONFLICT: GENOCIDE OR WAR?【引用Lemkin】	ANPO, ART X WAR: The Art of Resistance 【纪录片影评】	Japanese Colonialism and the Asia-Pacific War in Japan's History Textbooks: Changing representations and their causes【日本历史教科书中的日本殖民主义与亚太战争:表征的变迁及其成因】	The Diaoyu Islands, China-Japan guan-xi and nuclear war: is there a role for Thomas-Kilman model?【表征新颖】	Seeking Accurate Cultural Representation Mahjong, World War II, and Ethnic Chinese in Multicultural Youth Literature	Political Correctness in the Land of Conformity	RAPE: WEAPON OF WAR AND GENOCIDE【书评】【对于性暴力事件的指称：Japanese soldiers’ assaults in Nanking 最隐晦的】	The Puzzle of Extra-Lethal Violence	Memory of an Injustice: The "Comfort Women" and the Legacy of the Tokyo Trial【主题性】	THE CONFLICT IN SYRIA: THE FAILURE OF REDRESSING GENDER VIOLENCE IN ARMED CONFLICTS	An Honest Decade: William Empson And The Ambiguities Of Writing In The 1930s	Regional Community Building in Northeast Asia in a Global Context*	Major events and the collective memory of conflicts【引用takashi】	CONSIGNING JUSTICE TO HISTORY: TRANSITIONAL TRIALS AFTER THE SECOND WORLD WAR【战争审判】	Integrating rising powers: liberal systemic theory and the mechanism of competition	A past revisited: re-presentation of the Nanjing massacre in City of life and death.										Nature and Politics【暴力的本质：Violence is an ever-present feature of political life in times of peace (read “law and order”) and in times of war.】
2014	16	13	3	16	Holocaust Denial Literature Twenty Years Later: A Follow-up Investigation of Public Librarians' Attitudes Regarding Acquisition and Access【否认大屠杀与信息检索教学】【只提及】	HOW EAST ASIA COULD AMPLIFY ITS VOICE IN GLOBAL ECONOMIC GOVERNANCE	The Dialectics of Remembrance: Memories of Empire in Cold War Japan【主题性】	Contemplating the true nature of the notion of "responsibility" in responsible command【引用新闻】	China, the Chinese Representative, and the Use of International Law to Counter Japanese Acts of Aggression: China's Standpoint on UNWCC Jurisdiction	A New Textbook Solution to East Asia's History War?: Assessing Civil Society Reconciliation Efforts and the New East Asian Modern and Contemporary History	Review of Augustine Brannigan, Beyond the Banality of Evil: Criminology and Genocide: Oxford, UK: Oxford University Press, 2013. ISBN: 978-0199674626, 261 pages, US$87.15 (hardcover)【书评】	China as a Factor in Japan-India Relations	A New Paradigm of Customary International Criminal Law: The UN War Crimes Commission of 1943-1948 and its Associated Courts and Tribunals【东京审判后中国国内的BC级战犯审判】	How the Current Paradigm Shift is Changing Our Understanding of Ethics【作为例证，并列选项】	GENOCIDE'S DEADLY CYCLE LETTER FROM THE CAUCASUS【新生儿】	The East China Sea Disputes: History, Status, and Ways Forward【中日关系】	Rewriting the Chinese National Epic in an Age of Global Consumerism: City of Life and Death and The Flowers of War【电影研究】
2015	21	15	0	15	Memory/Postmemory, Ethics and Ideology: Toward a Historiographic Narratology in Film【主题性】【电影】	Victims, Heroes, Men, and Monsters: Revisiting a Violent History in City of Life and Death【电影】	The strategies of mnemonic battle: On the alignment of autobiographical and collective memories in conflicts over the past	Japan's Postwar Reconciliation with Southeast Asia【新加坡历史课本中写南京大屠杀被杀40万人】	Consumer ethnocentrism and consumer animosity: antecedents and consequences【引用张纯如但人数30万】	Former Combatants on Sexual Violence During Warfare: A Comparative Study of the Perspectives of Perpetrators, Victims, and Witnesses【战争中实施性暴力的动机】	Excavating the power of memory in Japan【日本对战争记忆的方式与中韩不同】	War Occurrence: Hyper-Insecurity and Multilateral Institutions【习在首个国家公祭日的说话】【和平叙事】【周边国家经济合作】	The Blind Men, the Elephant, and Regional Order in Northeast Asia: Towards a New Conceptualization	Historical Analogy and Demonization of Others: Memory of 1930s' Japanese Militarism and Its Contemporary Implications【有问题的并置】	The Showa Masterwork of Manga Pioneer Shigeru Mizuki	Haunting memories of war in Chinese cinema and diaspora: Visions of national trauma, power and autoethnographic collage【影像中的南京大屠杀】	Being Singular Plural in Chi's 巨流河 (The Great-Flowing River)【文学】【提及】	Reading ethics and the body in Geling Yan's The Flowers Of War	Chinese Transformation Policies for 2015 and Beyond: Quo Vadis?											THE IMPORTANCE OF THE INTERNATIONAL MILITARY TRIBUNALS AT NUREMBERG AND TOKYO【两次国际审判法庭的重要性】	History lessons feed competing nationalisms.【新闻报道】【认为中国官方叙事对于慰安妇的重视程度远不及南京大屠杀】
2016	19	14	7	21	The Cultural Impact of the Nanking Massacre in Cinematography: On City of Life and Death (2009) and The Flowers of War (2011)【南京大屠杀在电影摄影中的文化影响:《南京南京》(2009)和《金陵十三钗》(2011)】	Victoria E. Collins: State Crime, Women and Gender: Routledge, Oxford and New York, 2016, 223 pp【书评】【种族灭绝式强奸举例】	The Case against Asian Authoritarianism: A Libertarian Reading of Liu E’s The Travels of Laocan【陆川发言】	Sino-Japanese Relations; Past and Present【书评】【中日关系偏日】	Book review: A World History of War Crimes: From Antiquity to the Present【书评】	“Somos Asiáticos”: Asian Americans, Latinos, and Hispanics of Asian ancestry	Rashomon Revisited: A Re-analysis of the Film and Implications for Mass Psychology【大众心理对个体行为的影响】	Humanitarian Negotiation to Protect: John Rabe and the Nanking International Safety Zone (1937-1938)【主题性】	CHINESE HISTORICAL FICTION IN THE WAKE OF POSTMODERNISM: TWO VERSIONS OF YAN GELING'S THE FLOWERS OF WAR【主题性】	Economic Integration and National Identity in Northeast Asia: A European Perspective【国际政治】【认为中国打历史牌】	Nationalism, Nationalistic Demos and Democracy: East Asian Experiences	The Living Goddess of Mercy at the Rape of Nanking: Minnie Vautrin and the Ginling Refugee Camp in World War II (1937-1938) 【主题性】	Psychohistorical Hypotheses on Japan's History of Hostility Towards China【引用Askin】	Reconciliation and Peace Building in International Relations: An Empirical Analysis of Five Cases											Violated or protected. Women's rights in armed conflicts after the Second World War【战争中的女性权利】	CHAPTER 1: HUMILIATION AS PATHWAY TO VIOLENCE【南京大屠杀死亡人数4万人】
2017	16	14	13	27	Geling Yan's The Flowers of War: Bitterness and Sacrifice in Colonized China【文学】	The Japanese Amau Doctrine and Understanding Modern Day Mega Trade Deals	LIVES OF THE AGING: THE YEAR IN CANADA	A WARTIME STAMPEDE: RENEWING A SOCIAL CONTRACT AFTER THE GREAT TUNNEL DISASTER OF CHONGQING【重庆大爆炸与南京大屠杀一样成为民族主义叙事的一部分】	Modern Christian Landscape in Nanjing, China: A Literature Review	Francis Fukuyama and the End of History	Mormon Poetry, 2012 to the Present【南京大屠杀主题诗歌】	Light Supremacy Vis-À-Vis Non-White Immigrants: The Implications of Skin Color in Pursuit of the American Dream【中日对待黑人的态度】【重复段落】	What Is Wrong with Us? What Is Wrong with the World? A Buddhist Perspective【二元思维招致的问题】	Karl Schwesig's Schlegelkeller: Anatomy of a Rejected Warning of Prewar Violence at LIFE Magazine【生活杂志报道了南京大屠杀却对屠犹保持沉默】	Rethinking PeaceBuilding in East Asia: The Case of Japan’s Struggle over History in Postwar Era 【主题性】	Gender Communal Terrorism or War Rape: Ten Symbolic Reasons【引用多条】	Threnody and the Aesthetics of Interculturality in Twenty-First- Century East Asian Composition【交响乐分析】	The Left Side of History: The Embattled Pasts of Communism in the Twentieth Century
2018	11	9	6	15	Introduction: Mapping the Contours of State Crime and Colonialism【张纯如的贡献】	The Nanking Massacre on Gum Cards: The Blony Horrors of War Series【主题性】	Collective Memory in Advocating Peace. The Nanjing Incident as a case study【指称】	Retranslation as a socially engaged activity: the case of The Rape of Nanking	Soft Side of a Security Community in Northeast Asia【否认派：引用Higashinakano Shudo】	The History of the Textbook: The State of the Discipline	Mediated Massacre: Digital Nationalism and History Discourse on China's Web【主题性】	Inadequate Innocence of Korean Comfort Girls-Women: Obliterated Dignity and Shamed Self	Effective Reparation for the Guatemala S.T.D. Experiments: A Victim-Centered Approach【引用Timothy Brook】
2019	10	9	6	15	Gendered Violence: Jewish Women in the Pogroms of 1917–1921: A Journal of Jewish Women's Studies & Gender Issues	Independent Biographical Documentaries: The Year in China【纪录片二十二的众筹】	Repositioning the Narrative of the Japanese Canadian Internment through Multidirectional Memory	History and Territorial Disputes, Domestic Politics, and International Relations: An Analysis of the Relationship among South Korea, China, and Japan【主题小节】	The Sonyŏsang Phenomenon: Nationalism and Feminism Surrounding the "Comfort Women" Statue【对比例证】	Medical care in armed conflict: Perpetrator discourse in historical perspective【主题小节】	The Bemba Appeals Chamber Judgment: Impunity For Sexual And Gender-Based Crimes?【战争审判】	Narrativizing trauma, activating awareness: Iris Chang’s The Rape of Nanking and its afterlives【主题性】	Translating Transculturality: Mediation of Identity in John Rabe's Diaries																	RAPE AS A WEAPON OF WAR AGAINST WOMEN AND GIRLS【引用张纯如】【战争中对女性和小孩的性暴力】
2020	5	4	11	15	The Art of Persistence: Akamatsu Toshiko and the Visual Cultures of Transwar Japan. By Charlotte Eubanks,. Honolulu: University of Hawai‘i Press, 2019. 344 pp. ISBN: 9780824878283 (cloth).【书评】【日本艺术家创作主题画作并自认战犯】【提及】	JAPAN. By Jeff Kingston【书评】【安倍政府如何回应历史问题】【提及】	‘A Continuous Retrial’: Trans/national Memory in Chinese and Japanese Tribunal Films【主题性】【战争审判影片】	Nationalistic appeals and consumer boycotts in China, 1900-1949【民族主义与消费者抵制行为】【提及】
2021	15	12	4	16	Proscribing the “Spiritually Japanese”: Nationalist Indignation, Authoritarian Responsiveness and Regime Legitimation in China Today【精神日本人】	Death Games and the Persistence of Memory: J. G. Ballard's World War Ii Fictions【战争小说叙事中作为例证出现】	Sister cities, cross-national FDI, and the subnational FDI location decision【友好城市关系】【南京与名古屋】	Re-dream the Red Dream: China's Chance to Re frame the Narrative of Humiliation into One of Honor【引用LEWIS】【4w死亡人数】	The Impact of Political Apologies on Public Opinion【安倍的道歉没有承认战争责任的致歉】	Writing Unspeakable Things: Speechlessness, Abjection, and the Ethics/Aesthetics of (Not) Representing Sexual Violence in Three Korean American "Comfort Women" Novels【韩国慰安妇叙事】【提及】	LETTERS FROM IWO JIMA (2006)【影评】	The Great Leap Backward: Forgetting and Representing the Mao Years【书评】【后记忆的价值】【张纯如】	Fascism's Stages: Imperial Violence, Entanglement, and Processualization【不可靠引用】【为避免偏颇引用多人，但数字造假】	CHINESE HERITAGE WITH EUROPEAN CHARACTERISTICS: INTERNATIONAL AND DOMESTIC DIMENSIONS OF THE CHINA'S CULTURAL HERITAGE POLITICS【纪念馆展品带有欧洲色彩】【非主题】	“Is This a Safe Space?”: Examining an Emotionally Charged Eruption in Critical Language Pedagogy【课堂上混合学生对否认南京大屠杀的反应】【引用】	Deciphering the Transnational Poetics in Wing Tek Lum's The Nanjing Massacre: Poems【主题性】【文学】	Nanjing Massacre in Chinese and Japanese history textbooks: transitivity and Appraisal	The affective life of the Nanjing Massacre Reactivating historical trauma in governing contemporary China	Event, Trauma, and Ethics in Wing Tek Lum's The Nanjing Massacre	THE WAR OF TEXTBOOKS: EDUCATING CHILDREN DURING THE SECOND SINO-JAPANESE WAR, 1937-1945									Why were there no war crimes trials for the Korean War?【韩国人将朝鲜人某次行为与南京大屠杀并置】【质疑为什么没有战争审判】	有一篇作为事件标语【在南京大屠杀之后】
2022	3	2	28	30	“Warphans” and “Quiet” Heroines: Depictions of Chinese Women and Children in the Comité mondial des femmes contre la guerre et le fascisme's Campaigns during the Second Sino-Japanese War	The Minds Behind the Movement: The Role of Academics in East Asia's War Reparations Litigation【非主题】【提及】	The Partition of India, Bengali “New Jews,” and Refugee Democracy: Transnational Horizons of Indian Refugee Political Discourse	Understanding Mistrust and Instability in East Asia	RED LINES ARE TESTED	Beyond Repression and Resistance: Worker agency and corporatism in occupied Nanjing	Pain and Prejudice in the World Literary Market	AN EXAMINATION OF BRITAIN'S GEOPOLITICAL CONSIDERATIONS CONCERNING THE POST-WORLD WAR II PEACE TREATY WITH JAPAN	China's Assertiveness in the South and East China Sea: A Constructivist Approach	Heritage interpretation, conflict and reconciliation in East Asia: global issues in microcosm	A Crisis after the Crisis: Postconflict Stigmatization of Boko Haram's Sexual-Violence Victims in Northeastern Nigeria 1	A Prototype System of Sustainable Community Memory Archive for Public Libraries	Introduction: A Critical Evaluation of Mark Ramseyer's Arguments for "Comfort Women" as Voluntary Prostitutes with Labor Contracts	Listen to the Voices of the Women	Relocation and Dislocation: Civilian, Refugee, and Military Movement as Factors in the Disintegration of Postwar China, 1945–49	Sexual Violence as a Form of War Tactic and Criminal Terror - Victimological Perspective	Nationalism and Media【认为南京大屠杀是极端案例来研究网络舆论？】	Locating and Situating Justice Pal: TWAIL, International Criminal Tribunals, and Judicial Powers	Human Dignity, Human Rights, and Social Justice: A Chinese Interdisciplinary Dialogue with Global Perspective. Edited by Xie, Zhibin , Kollontai, Pauline , and Kim, Sebastian . Singapore: Springer Nature, 2020. Pp. 239. $149.99 (cloth); $149.99 (paper); $109.00 (digital). ISBN: 9789811550805 .【书评】【仅提及】	Never Forget National Humiliation: Historical Memory in Chinese Politics and Foreign Relations【书评】	Queering the Color Line within the Color Line: W. E. B. Du Bois and the Transwar Transpacific	The Construction of Value Identity Through Ritual Education: Its Internal Logic and Practice Approach Based on a Case Study of Ritual Education in Jiangsu【非主题】【纪念活动/仪式教育】	Ramseyer, the Japanese Right-wing and the “History Wars”	Creating Futuristic Heritage Experiences: An Exploratory Co-Design Study through Design Fiction	Guest editorial: Heritage interpretation, conflict and reconciliation in East Asia
2023	0	0	26	26	To Anglicize and Angelize the Rape of Nanking	The UNESCO Memory of the World Programme and claims for recognition of atrocities: The nominations of Documents of Nanjing Massacre and Voices of the 'Comfort Women'	Public Secrets, Private Exposures: Li Ang's The Lost Garden and Ye Zhaoyan's Nanjing 1937: A Love Story	Soft and resilient: When embroidery encounters narrating the Nanjing Massacre in the Memorial Hall	Portrayal of the national identity in Chinese language textbooks	Animosity, Amnesia, or Admiration? Mass Opinion Around the World Toward the Former Colonizer	Solitary Swedish Sinologists: Three Hundred and Fifty Years of Swedish China Studies.	In Search of Peace Studies in China: The Rise of Rights Movements, Conflict Resolution, and Prospects of Peace Studies	An examination of tourists’ national identity, place attachment and loyalty at a dark tourist destination.	DARK TOURISM: A BIBLIOMETRIC REVIEW OF THE PAST, PRESENT AND FUTURE TRENDS.	Torn between the nation and the world: D. F. Karaka and Indian journalism in the Second World War.	“HEINOUS CRIMES WHOSE RECORD WOULD RUN TO MORE THAN 2,000 PAGES”: AN ANALYSIS OF FIVE JAPANESE PERPETRATORS’ STATEMENTS ON JAPAN’S CRIMES AGAINST HUMANITY IN CHINA DURING THE SECOND WORLD WAR	Applying mixed methods to explore lighter and darker shades in hybrid dark tourism experiences.	Tsurumiism.	Embedded Coexistence: Social Adaptation of Chinese Female White-Collar Workers in Japan	Coming Home (2014) and Its Symptoms.	State Institutions as Building Blocks of China’s Infrastructures of Memory – The Case of Intangible Heritage.	JAPAN’S PACIFICISM AS NATIONAL IDENTITY AND A “NORMAL” SECURITY OPTION: WHY JAPAN’S CONSTITUTIONAL PEACE CLAUSE IS UNLIKELY TO BE AMENDED	German-Polish Reconciliation and Sino-Japanese Reconciliation: Comparative Reflections	Intratextual Ishiguro: Transitional Spaces and the Unmaking of Interpretative Communities. Texas Studies in Literature and Language.	Japanese Buddhist War Support and the Kanchō System【佛教布道者否认南京大屠杀】	Commemorative contention: The Taipei National Revolutionary Martyrs’ Shrine and the politics of death	Past and Present in Japanese Historiography: Four Versions of Presentism	From Victim to Victor Changing the Narrative in 21st Century China
2024	0	0	7	7	The reproduction of imagination: how do non-experiencers remember history?	Choreographing Social Memories: Healing and Collective Imagining in Eiko Otake and Wen Hui's Artistic Collaboration	Objectification, Bodily Revenge, and National Identity: Refashioning 'Comfort Women' in Chinese Cinema	Imagining Japanese Hymns in a World God Imagines 1	Reconceptualizing the Study of Christian Universities in the Republican Era in Today’s China	The Cinematic Past and the Literary Present of Yan Geling's Novel The Rowers of War (2012)	‘We resolve our own sorrows’: screening comfort women in Chinese documentary films
总数	908	423	166	589

## Sheet: wos有效
年份	WOS CORE	有效	书评	文章信息
1937	0	0
1938	0	0
1939	0	0
1940	0	0
1941	0	0
1942	0	0
1943	0	0
1944	0	0
1945	0	0
1946	0	0
1947	0	0
1948	0	0
1949	0	0
1950	0	0
1951	0	0
1952	0	0
1953	0	0
1954	0	0
1955	0	0
1956	0	0
1957	0	0
1958	0	0
1959	0	0
1960	0	0
1961	0	0
1962	0	0
1963	0	0
1964	0	0
1965	0	0
1966	0	0
1967	0	0
1968	0	0
1969	0	0
1970	0	0
1971	0	0
1972	0	0
1973	0	0
1974	0	0
1975	0	0
1976	0	0
1977	0	0
1978	0	0
1979	0	0
1980	0	0
1981	1	0
1982	0	0
1983	0	0
1984	0	0
1985	0	0
1986	0	0
1987	0	0
1988	0	0
1989	0	0
1990	0	0
1991	0	0
1992	0	0
1993	1	0
1994	1	0
1995	3	2		Remembering The Nanjing-Massacre + Choy,Christine Documentary - 'In The Name Of The Emperor' (1995)	Magee,John Documentary Footage Of The Massacre Of Nanjing, China, 1937-1938
1996	0	0
1997	2	0	2	The rape of Nanking - How ''the Nazi Buddha'' resisted the Japanese【无获取方式】	The rape of Nanking - The forgotten holocaust of World War II - Chang,I 【放在1998里了】【重复】
1998	5	0	5	The rape of Nanking: The forgotten holocaust of World War II.-Barshay【无获取方式】	The Rape of Nanking: The forgotten Holocaust of World War II	The rape of Nanking: The forgotten Holocaust of World War II.	The rape of Nanking. The forgotten Holocaust of World War II.-Lin【无获取方式】	The "Rape of Nanking"(World War II history)
1999	6	2	4	News from Nanking (How the author helped get first-account accounts of the Rape of Nanking out of China in 1938)【无获取】	The rape of Nanking (WuDunn's review of Rabe)-ChanG.I	The rape of Nanking: The forgotten holocaust of World War II-FOGEL	The Nanjing massacre: A Japanese journalist confronts Japan's national shame.-Levine	The Nanjing massacre: A Japanese journalist confronts Japan's national shame-Veale	Convergence or divergence? Recent historical writings on the Rape of Nanjing
2000	9	5	7	The Nanking 100-man killing contest debate: War guilt amid fabricated illusions, 1971-75-Wakabayashi	Documents on the rape of Nanking.-Minear	The terror-genocide of Nanking, 1937-38 - The systematic character of Japanese war crimes-Makino【德语】	American goddess at the rape of nanking: The courage of Minnie Vautrin.-Levine	The Nanjing massacre in history and historiography.-BOYLE	The Nanjing massacre: A Japanese journalist confronts Japan's national shame.-Creighton	The Nanjing massacre: A Japanese journalist confronts Japan's national shame.-McCormack	The Nanjing massacre: A Japanese journalist confronts Japan's national shame-Yang	The Nanjing massacre in history and historiography.-Pye
2001	16	7	12	Isolating knowledge of the unpleasant: the rape of Nanking in Japanese high-school textbooks	Nanking: Anatomy of an atrocity-Fogel	Nanking: Anatomy of an atrocity-Wakabyashi【评价多书】	Nanking: Anatomy of an atrocity.-Wilkinson	Documents on the rape of Nanking-Makino	The Tokyo judgment and the Rape of Nanking-Brook	Documents on the Rape of Nanking-Yamamoto	Documents on the Rape of Nanking-LARY	The rape of nanking: The forgotten Holocaust of World War II-Whitten	The Nanjing massacre in history and historiography.-Wakabayashi	The Nanjing massacre in history and historiography-Leutner	The Nanjing massacre in history and historiography-Kasahara	The Nanjing massacre: A Japanese journalist confronts Japan's national shame-BOYLE	The Nanjing massacre: A Japanese journalist confronts Japan's national shame-yoshida
2002	9	3	7	Eyewitnesses to massacre: American missionaries bear witness to atrocities in Nanjing.-Mitter	Nanking: Anatomy of an atrocity.-Huffman	Nanking: Anatomy of an atrocity-Matsusaka	Nanking 1937: Memory and healing.-Zhang&Liu	Nanking 1937: Memory and healing-Dyche	Nanking 1937: Memory and healing.-Minear	The Nanjing massacre in history and historiography.-Matsusaka	The Nanjing massacre in history and historiography-Cesari	Nanjing, December, 1937'-Tek Lum【诗歌】
2003	1	1	1	The Nanjing massacre in history and historiography.-Orr
2004	3	2	1	Reflections with memories': Everyday photography capturing genocide	Nanking 1937: Memory and healing-Bix
2005	4	0		Victims or victimizers? Museums, textbooks, and the war debate in contemporary Japan	Extreme mass homicide: From military massacre to genocide
2006	3	1	1	The making of the 'Rape of Nanking': History and memory in Japan, China, and the United States	The Nanjing Massacre. Changing Contours of History and Memory in Japan, China, and the U.S.		Useless to the state: "Social problems" and social engineering in nationalist Nanjing, 1927-1937.
2007	7	6	2	The making of "The Rape of Nanking". History and memory in Japan, China, and the United States-Krebs【无法获取】	Making of the "Rape of Nanking": History and memory in Japan, China, and the United States (A study of the weatherhead east Asian Institute, Columbia University).-Orr	Remembering the Southeast Asian Chinese massacres of 1941-45	The Nanking Atrocity: An Interpretive Overview	The Nanjing Massacre: official remembrance and history textbooks in the People's Republic of China	They Were in Nanjing: The Nanjing Massacre Witnessed by American and British Nationals	Look Back in Anger. Filming the Nanjing Massacre		Useless to the state: "Social problems" and social engineering in nationalist Nanjing, 1927-1937.	Useless to the state: "Social problems" and social engineering in nationalist Nanjing, 1927-1937.
2008	12	4		The Nanking atrocity 1937-1938: Complicating the picture-Kushner	The Nanking Atrocity 1937-38: Complicating the Picture-Mitter	The Nanking Atrocity 1937-38: Complicating the picture-Rose	The Nanking Atrocity, 1937-38: Complicating the Picture-Smith	The Nanking atrocity 1937-38: Complicating the picture	Far from oblivion: The Nanking Massacre in Japanese historical writing for children and young adults	The Rape of Nanking: 1937, one of the biggest massacres of the 20th century【法语】	Rethinking The Nanjing Massacre And Its Connection With The Holocaust【无法获取】	Let the dead be remembered Interpretation of the Nanjing Massacre Memorial【无法获取】【书籍 Places of Pain and Shame章节】	For the Nation or for the People? History and Memory of the Nanjing Massacre in Japan【书籍章节】	The nationalist discourse in contemporary Japan: The role of China and Korea in the last decade		Useless to the state: 'Social problems' and social engineering in nationalist Nanjing, 1927-1937
2009	7	7	2	The Nanking Atrocity, 1937-38: Complicating the Picture.-Ragsdale	The Nanking Atrocity 1937-38: Complicating the Picture-Schoppa	Memory on Trial: Constructing and Contesting the 'Rape of Nanking' at the International Military Tribunal for the Far East, 1946-1948	Waging sexual warfare: Case studies of rape warfare used by the Japanese Imperial Army during World War II	Terror in Minnie Vautrin's Nanjing: Diaries and Correspondence, 1937-38	From the Nanjing Massacre to American Global Expansion: Reflections on Japanese and American Amnesia	A study of extant Japanese materials concerning the Rape of Nanjing						Useless to the State: "Social Problems" and Social Engineering in Nationalist Nanjing, 1927-1937
2010	8	7		The Nanking Atrocity, 1937-38: Complicating the Picture-Hess	The Legacy of China's Wartime Reporting, 1937-1945: Can the Past Serve the Present?	Political Centres, Progressive Narratives and Cultural Trauma: Coming to Terms with the Nanjing Massacre in China, 1937-1979【论文集】	The effect of essentialism in settings of historic intergroup atrocities	Historical Disputes and Reconciliation in Northeast Asia: The US Role	History, Nationalism and Face in Sino-Japanese Relations	War, Memory, the Artist and The Politics of Language	Genocidal Mutation and the Challenge of Definition		GENOCIDAL MUTATION AND THE CHALLENGE OF DEFINITION
2011	10	1		Writing about Atrocity: Wartime Accounts and their Contemporary Uses	REVISIONISM AND THE NANJING ATROCITY	The Woman Who Could Not Forget: Iris Chang Before and Beyond The Rape of Nanking【书籍】【张纯如母亲写的】	Telling histories of an island nation The academics and politics of history textbooks in contemporary Taiwan【书籍章节】						Unmaking the Chinese Nationalist State: Administrative Reform among Fiscal Collapse, 1937-1945
2012	5	4		Rediscovering a massacre: The filmic legacy of Iris Chang's The Rape of Nanking	Witnessing atrocity through auto-bio-graphy: Wing Tek Lum's The Nanjing Massacre: Poems	Raw Individualists': American Soldiers on the Bataan Death March Reconsidered	A Mission under Duress: The Nanjing Massacre and Post-Massacre Social Conditions Documented by American Diplomats	Conflict Museums, Nostalgia, and Dreaming of Never Again
2013	4	3		A past revisited: Re-presentation of the Nanjing Massacre in City of Life and Death	The Unbearable Heaviness of Memory Nanjing to Tao Baojin and His Descendants	The Nanking Atrocity: Still and Moving Images 1937-1944	Textbooks and Patriotic Education: Wartime Memory Formation in China and Japan
2014	5	3		Exhibiting the Past: China's Nanjing Massacre Memorial Museum	The Nanking Atrocity: Still and Moving Images 1937-1944【书评】	Rewriting the Chinese National Epic in an Age of Global Consumerism: City of Life and Death and The Flowers of War	Nanjing 1937: Battle for a Doomed City-lu suping
2015	8	0		Reading ethics and the body in Geling Yan's The Flowers Of War
2016	17	7	1	The Living Goddess of Mercy at the Rape of Nanking: Minnie Vautrin and the Ginling Refugee Camp in World War II (1937-1938)-Guo	The Cultural Impact of the Nanking Massacre in Cinematography: On City of Lite and Death (2009) and The Flowers of War (2011)	Contested Images of Rape: The Nanjing Massacre in Chinese and Japanese Films	Popular geopolitics of Chinese Nanjing massacre films: a feminist approach	Nanjing 1937: Battle for a Doomed City【书评】	Humanitarian Negotiation to Protect: John Rabe and the Nanking International Safety Zone (1937-1938)	China's 'info-web': How Beijing governs online political communication about Japan	Too dark to revisit? The role of past experiences and intrapersonal constraints	Culture trauma, morality and solidarity: The social construction of "Holocaust' and other mass murders	The Nanjing Massacre in Fiction and the Expression of the Idea of the Nation-state	Mediating Trauma the Nanjing Massacre, City of Life and Death, and Affect as Soft Power
2017	14	13		Diplomatic compromises between the United States and Japan during the Nanjing Massacre	The Nanjing Massacre as recorded in American sources	Historical shifts in remembering China's "Nanjing Massacre"	Remembering Nanking: historical reconstructions and literary memorializations of the Nanking Massacre	Seeking evidence: The 1984 visit to Nanjing by a Japanese investigative team and its significance	The Nanjing Massacre and the traumatic memory of Nanjing residents	Trace, incident, and testimony: The story of Amano Kozo, lieutenant of the 33rd regiment of the 16th division of Japan's China expeditionary army	Eightieth anniversary of the Nanjing Massacre: Editor's introduction	Nanjing 1937: Battle for a Doomed City--Wakabayashi【书评】	Arendt in Asia: Responsibility and Judgment in Nanjing and Hiroshima	Exploring sub-dimensions of intrapersonal constraints to visiting "dark tourism" sites: a comparison of participants and non-participants	Cultivating Power: Gardens in the Global Politics of Diplomacy, War, and Peace	Debating History and Memory: Examining the Controversy Surrounding Iris Chang's The Rape of Nanking
2018	13	6		A failure of global documentary heritage? UNESCO's "memory of the world' and heritage dissonance in East Asia	Mediated Massacre: Digital Nationalism and History Discourse on China's Web	Retranslation as a socially engaged activity: the case of The Rape of Nanking	Witnesses to a war crime: the Nanjing Massacre - the British and US reports	Battle lines: One battle, two countries and a whole lot of opinions. We talk to people in China and Japan about what they learnt at school about the Nanjing massacre	Collective Memory in Advocating Peace. The Nanjing Incident as a case study	Architecture as Synthetic Agency: Narrative-Augmented Design in Practice【无关】	The Meaning of Christianity in the Film and Novel "The Flowers of War"	How does embodiment work in dark tourism "field"? Based on visitors' experience in Memorial Hall of the victims in Nanjing Massacre	The inner struggle of visiting "dark tourism' sites: examining the relationship between perceived constraints and motivations【事件表征中非常有问题】【怀疑精日？】		Architecture as Synthetic Agency: Narrative-Augmented Design in Practice	Cherishing Children The National Child Welfare Association in the Nanjing Decade, 1928-1937
2019	16	6		Narrativizing trauma, activating awareness: Iris Chang's The Rape of Nanking and its afterlives	Research on the Psychological Mechanism of Trauma Writing in Ha Jin's New Immigrant Novels	The texture of memory: media, trauma, and the Nanjing Massacre【书评】	Remembrance of the Nanjing Massacre in the Globalised Era: The Memory of Victimisation, Emotions and the Rise of China	International tourists' dark tourism experiences in China: the case of the memorial of the victims of the Nanjing Massacre	Peace or War? Battle of Shanghai in 1937 and China's National Strategy in the Sino-Japanese War 1937-1945【无法获取】	Affective Ties That Bind: Investigating the Affordances of Social Networking Sites for Commemoration of Traumatic Events	A Quantitative Analysis of Creating Genius Loci in a Museum Based on Spatial Visibility Analysis				The T/Daos shall meet: The failure and success of English transliterations of Mandarin Chinese English transliterations of Mandarin are often inconsistent, but is there even such a thing as a single Mandarin language?
2020	25	11		Romancing Atrocity Ye Zhaoyan's Nanjing 1937: A Love Story	That Which Is Carved in Stone: Nanjing's Monuments and Chinese Commemoration of the Second World War	MANY DOORS TO INTERNATIONAL CRIMINAL JUSTICE	History Wars in the Memory of the World: The Documents of the Nanjing Massacre and the "Comfort Women"【书籍章节】	Introduction: Articulating the Heritage of Punishment【无关】	CHONGQING AND NANJING - WAR, CIVIL WAR AND THE AFTERMATH: 1937-43【无法获取】	Heritage, Memory, and Punishment: Remembering Colonial Prisons in East Asia【书籍zlib】	Canada's "History Wars": The "Comfort Women" and the Nanjing Massacre【无法获取】	The "History Wars" and the "Comfort Woman" Issue: Revisionism and the Right-wing in Contemporary Japan and the U.S.	Japan's demands for reforms of UNESCO's memory of the world: the search for mnemonical security	Analysis of popular educational manga on World War II for students in Japan	The antecedents and consequences of awe in dark tourism	From mixed emotional experience to spiritual meaning: learning in dark tourism places	War memory as an independent factor in Japan's relations with neighbors: on the 75th anniversary of Japan's surrender【无法获取】【有效摘要】	Foreign Friends and Problematic Heroes: Remembering a Global World War Two in Early Twenty-first Century Chinese Cinema 【China‘s war with Japan】	International tourists' dark tourism experiences in China: the case of the memorial of the victims of the Nanjing Massacre
2021	16	4		THE INVASION OF NANKING AND TURKISH PRESS (1937-1938)【土耳其语】临近 20 世纪中叶，在世界帝国主义论调日趋紧张之际，日本于 1937 年 7 月发动了侵华战争。 西方国家的沉默和国际联盟未能对这一举措作出威慑性决定，导致日本逐渐扩大对中国的影响，并实施了越来越多的暴力行动。 北京、上海以及当时的首都南京先后被日本占领。 在占领南京期间，许多平民遭到日军的酷刑、强奸和杀害，这一事件被称为南京大屠杀。 从甲午战争一开始，土耳其新闻界就与全世界一道，密切关注远东发生的事件，并作出评价。 土耳其报刊认为，这场侵略运动是日本主要目标苏维埃俄国之前的一步，并预言如果欧洲和美国介入，将导致世界大战。 土耳其报刊详细报道了日本军队进入南京城门和南京沦陷的过程，认为占领运动不会在首都沦陷后结束。 虽然土耳其报刊广泛报道了占领的军事层面及其对国际关系的…	Ghost Meat Horror, Trauma, and Visceral History 【小说：The Devil of Nanking】【无法获取】	Deciphering the Transnational Poetics in Wing Tek Lum's The Nanjing Massacre: Poems	Nanjing Massacre in Chinese and Japanese history textbooks: transitivity and Appraisal	The Nanjing Massacre Ceramic Shoes Exhibition An Interview with Artist Wang Cheng【访谈】【无法获取】	The affective life of the Nanjing Massacre Reactivating historical trauma in governing contemporary China	Event, Trauma, and Ethics in Wing Tek Lum's The Nanjing Massacre	THE WAR OF TEXTBOOKS: EDUCATING CHILDREN DURING THE SECOND SINO-JAPANESE WAR, 1937-1945	Consumer Boycotts, Country of Origin, and Product Competition: Evidence from China's Automobile Market【指称】				Chinese-Language Newspapers and Diasporic Chinese Identity in Australia, 1931-1937
2022	28	28		The motif of tears: representations of activism and suffering in the Liji Alley Museum in Nanjing	From Ethical Literary Criticism to the Combination of History and Poetry: The Writing of Nanjing Massacre in Contemporary Chinese Literature and Film and Television Works【中文】	"Guilt by Association": Japanese Canadians and the Nanjing Massacre Commemorative Day【无法获取】	The Nanjing Massacre and the Making of Mediated Trauma Afterword【书籍章节】	The Nanjing Massacre and the Making of Mediated Trauma Translators' Preface	The Nanjing Massacre and the Making of Mediated Trauma Preface	The Nanjing Massacre and the Making of Mediated Trauma Conclusion	Human Memories. Eyewitness Accounts and Other Evidence of the Nanjing Massacre【德语】	Nanjing Massacre and the Making of Mediated Trauma	The Nanjing Massacre and the Making of Mediated Trauma Foreword	The Nanjing Massacre Memorial and Angelus Novus: Ephemera, Trauma, and Reparation in Contemporary Chinese Public Art	Negotiating cultural trauma in tourism	Emperor Hirohito's Post-Surrender Reflections	Hot interpretations of difficult heritage: the Memorial Hall of the Nanjing Massacre in China
2023	16	26		To Anglicize and Angelize the Rape of Nanking	The UNESCO Memory of the World Programme and claims for recognition of atrocities: The nominations of Documents of Nanjing Massacre and Voices of the 'Comfort Women'	Public Secrets, Private Exposures: Li Ang's The Lost Garden and Ye Zhaoyan's Nanjing 1937: A Love Story	Nanking 1937: literature as memory-Muller【法语】	Soft and resilient: When embroidery encounters narrating the Nanjing Massacre in the Memorial Hall	Standing in Solidarity: British Women and the China Campaign Committee, 1937-1945【图书】	Portrayal of the national identity in Chinese language textbooks				Ankara in Chinese Imagination: Turkish Capital and Its Influence on 'Temporary Capital' Chongqing 【事件表征】
2024	5	7		The reproduction of imagination: how do non-experiencers remember history?	Choreographing Social Memories: Healing and Collective Imagining in Eiko Otake and Wen Hui's Artistic Collaboration	Objectification, Bodily Revenge, and National Identity: Refashioning 'Comfort Women' in Chinese Cinema	Imagining Japanese Hymns in a World God Imagines 1	Reconceptualizing the Study of Christian Universities in the Republican Era in Today’s China	The Cinematic Past and the Literary Present of Yan Geling's Novel The Rowers of War (2012)	‘We resolve our own sorrows’: screening comfort women in Chinese documentary films
总数	277	166
