# Supplementary material
Source: Research Square preprint supplement (doi:10.21203/rs.3.rs-9456495/v1)
Supplement: Supplementary file 2 [file 5584ba3e3adc1cf2cafc5fce.xlsx]

## Sheet: 第一阶段评价态度统计
	情感	判断	鉴赏			情感	判断	鉴赏			情感	判断	鉴赏
积极	3	12	9		积极	1	2	1		积极	8	13	11
消极	20	31	6		消极	2	9	4		消极	11	21	26
中性		4	6		中性	1	3	2		中性
	情感	判断	鉴赏			情感	判断	鉴赏			情感	判断	鉴赏
积极		6	2		积极	1	9	7		积极		3	3
消极	5	8	1		消极	6	14	8		消极	7	8	5					情感	判断	鉴赏
中性					中性		3	2		中性		2	3				积极	22	83	83	188
																	消极	90	191	81	362
	情感	判断	鉴赏			情感	判断	鉴赏			情感	判断	鉴赏				中性	3	28	22	53
积极	2	8	6		积极	1	2	2		积极	3	4	6					115	302	186	603
消极	16	15	8		消极	3	6	3		消极	2	1	1					112	274	164	550
中性	1		2		中性					中性		1	1
	情感	判断	鉴赏			情感	判断	鉴赏			情感	判断	鉴赏
积极					积极		6	2		积极			2
消极		2			消极		7			消极	1	8	4
中性		11	2		中性		1			中性		2
	情感	判断	鉴赏			情感	判断	鉴赏			情感	判断	鉴赏
积极	3	4	16		积极					积极		5	8
消极	8	26	4		消极	4	8	3		消极		7	4
中性					中性					中性	1
	情感	判断	鉴赏			情感	判断	鉴赏			情感	判断	鉴赏
积极		1	1		积极		6	5		积极		2	2
消极	2	10	3		消极	2	4	1		消极	1	6
中性		1	3		中性					中性			1

## Sheet: 第二阶段评价态度统计
	情感	判断	鉴赏			情感	判断	鉴赏
积极		2	3		积极		6	4
消极		8	5		消极		7	5
中性		3			中性	2	1	1
	情感	判断	鉴赏			情感	判断	鉴赏
积极	2	4	5		积极		2	4
消极	3	5	4		消极	5	12	10
中性		2	1		中性
	情感	判断	鉴赏			情感	判断	鉴赏
积极	1				积极	2	9	5
消极	6	15	8		消极	5	4	7
中性	1	2			中性		1
	情感	判断	鉴赏			情感	判断	鉴赏
积极	7	9	3		积极		4	5					情感	判断	鉴赏
消极	4	5			消极	6	13	3				积极	13	49	39	101
中性	1				中性							消极	33	109	51	193
												中性	4	16	7	27
	情感	判断	鉴赏			情感	判断	鉴赏					50	174	97	321
积极			4		积极		6	3					46	158	90	294
消极	2	16			消极	1	12	3
中性		3	1		中性		4	2
	情感	判断	鉴赏
积极	1	7	3
消极	1	12	6
中性			2

## Sheet: 第三阶段评价态度统计
	情感	判断	鉴赏			情感	判断	鉴赏			情感	判断	鉴赏
积极		5	1		积极		2	1		积极		3	3
消极		10	4		消极	5	16	11		消极	9	14	2
中性		3	2		中性			1		中性			2
	情感	判断	鉴赏			情感	判断	鉴赏			情感	判断	鉴赏
积极		3	5		积极	1	3	9		积极		7	3
消极	5	12			消极	7	16	8		消极	6	10	1
中性					中性		1	6		中性	1	3	1
	情感	判断	鉴赏			情感	判断	鉴赏			情感	判断	鉴赏
积极		3			积极		3	2		积极
消极	12	32	7		消极		18	3		消极	7	22	5
中性	2	6	5		中性		5	1		中性		3	3
	情感	判断	鉴赏			情感	判断	鉴赏			情感	判断	鉴赏				情感	判断	鉴赏
积极	3	8	7		积极					积极	3	4	9			积极	10	46	47	103
消极	30	56	28		消极	1	12	5		消极	16	11	19			消极	114	260	105	479
中性			17		中性					中性	6	3	13			中性	14	32	60	106
																	138	338	212	688
	情感	判断	鉴赏														124	306	152	582
积极	3	5	7
消极	16	31	12
中性	5	8	9

## Sheet: 第四阶段评价态度统计
	情感	判断	鉴赏			情感	判断	鉴赏
积极	2	4	8		积极		1	3
消极	18	52	37		消极	3	8	4
中性		15	11		中性		2
	情感	判断	鉴赏			情感	判断	鉴赏				情感	判断	鉴赏
积极	2	3	4		积极	1	18	21			积极	24	96	102	222
消极	5	12	7		消极	36	28	17			消极	178	312	148	638
中性		3			中性		4	3			中性	3	47	37	87
												205	455	287	947
	情感	判断	鉴赏			情感	判断	鉴赏				202	408	250	860
积极	8	5	7		积极		17	7
消极	9	3			消极	38	67	25
中性			3		中性	3	1	2
	情感	判断	鉴赏			情感	判断	鉴赏
积极	1	1	5		积极		2	1
消极	5	2	2		消极	14	45	16
中性		3			中性		4	3
	情感	判断	鉴赏			情感	判断	鉴赏
积极	2	8	5		积极		6	10
消极		7			消极	18	25	12
中性					中性		8	5
	情感	判断	鉴赏			情感	判断	鉴赏
积极	2	8	9		积极	3	18	21
消极	5	18	9		消极	19	26	14
中性		4	10		中性
	情感	判断	鉴赏
积极	3	5	1
消极	8	19
中性		3

## Sheet: 数据汇总+饼图
时间区间		情感	判断	鉴赏	合计
	极性
	polarity
	态度类型
	Attitude Type
1938-1980	积极态度	22	83	83	188
	Positive Attitude					0.341818
	消极态度	90	191	81	362	0.658182
	Negative Attitude
	合计	112	274	164	550
		0.203636	0.498182	0.298182
1981-1990	积极态度	13	49	39	101
	Positive Attitude					0.343537
	消极态度	33	109	51	193	0.656463
	Negative Attitude
	合计	46	158	90	294
		0.156463	0.537415	0.306122
1991-2000	积极态度	10	46	47	103
	Positive Attitude					0.176976
	消极态度	114	260	105	479	0.823024
	Negative Attitude
	合计	124	306	152	582
		0.213058	0.525773	0.261168
2001-2024	积极态度	24	96	102	222
	Positive Attitude					0.25814
	消极态度	178	312	148	638	0.74186
	Negative Attitude
	合计	202	408	250	860
		0.234884	0.474419	0.290698

## Sheet: 细类数据统计
	1938-1980		情感	判断	鉴赏
		积极态度	22	83	83
		消极态度	90	191	81
	1981-1990		情感	判断	鉴赏
		积极态度	13	49	39
		消极态度	33	109	51
	1991-2000		情感	判断	鉴赏
		积极态度	10	46	47
		消极态度	114	260	105
	2001-2024		情感	判断	鉴赏
		积极态度	24	96	102
		消极态度	178	312	148
